# Supplementary material for: A Dataset on Corn Silage in China Used to Establish a Prediction Model Showing Variation in Nutrient Composition
Source: Hindawi journal article supplement (doi:10.1155/2023/7860822), 2023-01-01
Supplement: f1 [file 7860822.f1.docx]

Table S1. The nutrient contents and variation ranges of whole plant corn silage. (DM basis %)

| Nutrition index | Mean | SD | CV（%） | Min～Max | N |
| --- | --- | --- | --- | --- | --- |
| DM | 91.02 | 1.67 | 1.83 | 78.95～97.43 | 974 |
| CP | 9.40 | 1.19 | 12.62 | 4.78～17.96 | 974 |
| EE | 3.52 | 0.57 | 16.07 | 0.99～7.65 | 974 |
| Ash | 5.23 | 1.26 | 24.08 | 2.14～15.34 | 974 |
| NDF | 43.47 | 6.27 | 14.41 | 30.83～80.53 | 974 |
| ADF | 26.39 | 4.26 | 16.15 | 18.40～53.33 | 974 |
| Starch | 28.54 | 6.75 | 23.64 | 2.06～45.93 | 974 |
| Ca | 0.23 | 0.08 | 33.58 | 0.07～0.23 | 974 |
| P | 0.26 | 0.04 | 15.74 | 0.06～0.26 | 974 |

1 CV: variable coefficient.

Table S2. The rumen degradation and variation ranges of whole plant corn silage.

| Items | Mean | SD | CV（%） | Min～Max | N |
| --- | --- | --- | --- | --- | --- |
| IVTD24h | 77.89 | 4.98 | 22.53 | 45.38～88.79 | 974 |
| IVTD30h | 80.45 | 4.78 | 24.49 | 52.42～90.46 | 974 |
| IVTD48h | 84.14 | 4.31 | 27.22 | 50.65～92.57 | 974 |
| uNDF120 | 11.95 | 2.73 | 22.86 | 5.70～32.98 | 974 |
| uNDF240 | 9.98 | 2.42 | 24.24 | 4.49～28.50 | 974 |

Table S3. Morphological measurements of different cultivars of whole plant corn silage.

| Cultivar | Plant height (cm) | Plant weight (kg) | Kernel number (per /ear) | Ear number (per) | Ear weight (kg) | Emergence rate (%) |
| --- | --- | --- | --- | --- | --- | --- |
| Beinong 208 | 293.00 | 1.04 | 537.00 | 1 | 0.53 | 0.90 |
| Chuangyu 358 | 262.20 | 0.82 | 658.80 | 1 | 0.35 | 0.95 |
| Dafeng 30 | 277.50 | 0.73 | 561.50 | 1 | 0.31 | 0.93 |
| Dajingjiu 23D | 271.00 | 0.77 | 332.00 | 1 | 0.25 | 0.80 |
| Dajingjiu 23W | 324.00 | 1.40 | 607.00 | 1 | 0.54 | 0.80 |
| Dedan 1002 | 303.00 | 1.52 | 755.00 | 1 | 0.65 | 0.60 |
| Dedan 1104 | 291.80 | 1.23 | 750.94 | 1 | 0.57 | 0.89 |
| Dedan 123 | 263.76 | 0.87 | 526.36 | 1 | 0.34 | 0.91 |
| Dedan 1266 | 297.00 | 1.35 | 678.00 | 1 | 0.59 | 0.80 |
| Dedan 129 | 263.00 | 0.97 | 587.67 | 1 | 0.40 | 0.87 |
| Dedan 1403 | 274.50 | 0.80 | 629.65 | 1 | 0.37 | 0.93 |
| Dedan 5 | 250.40 | 0.80 | 475.60 | 1 | 0.31 | 0.82 |
| Demeiya 2 | 236.00 | 0.70 | 449.50 | 1 | 0.28 | 0.83 |
| Deyu 977 | 265.00 | 0.87 | 632.00 | 1 | 0.36 | 0.80 |
| Dongke 301 | 248.67 | 1.00 | 508.30 | 1 | 0.37 | 0.95 |
| Huamei 368 | 268.00 | 1.18 | 1056.00 | 2 | 0.35 | 0.90 |
| Jingke 968 | 262.25 | 1.08 | 621.00 | 1 | 0.44 | 0.81 |
| Jinling 377 | 294.00 | 1.10 | 543.50 | 1 | 0.39 | 0.90 |
| Jinpingguo 18 | 214.00 | 0.88 | 525.17 | 1 | 0.33 | 0.90 |
| Jindan73 | 283.25 | 1.03 | 713.00 | 1 | 0.45 | 0.91 |
| Longping 259 | 238.00 | 1.25 | 753.00 | 1 | 0.57 | 0.90 |
| Qiule 117 | 266.00 | 1.19 | 639.75 | 1 | 0.33 | 0.90 |
| Qiule 126 | 297.00 | 1.20 | 560.00 | 1 | 0.36 | 0.95 |
| Qiule 368 | 289.85 | 0.97 | 568.50 | 1 | 0.40 | 0.95 |
| Tiedan 16 | 260.00 | 0.98 | 748.00 | 1 | 0.40 | 0.90 |
| Tieyan 53 | 267.00 | 1.03 | 565.00 | 1 | 0.36 | 0.90 |
| Tunyu 10 | 293.00 | 1.12 | 720.00 | 1 | 0.45 | 0.90 |
| Ximeng 6 | 242.00 | 0.83 | 600.00 | 1 | 0.35 | 0.95 |
| Xianyu 1141 | 287.00 | 1.08 | 810.00 | 1 | 0.58 | 0.90 |
| Xianyu 1225 | 303.00 | 0.96 | 684.75 | 1 | 0.41 | 0.90 |
| Xianyu 1225-10d | 303.33 | 1.31 | 890.33 | 2 | 0.54 | 0.90 |
| Xianyu 1231 | 355.00 | 1.15 | 675.00 | 1 | 0.45 | 0.90 |
| Xianyu 1321 | 300.50 | 1.05 | 684.50 | 1 | 0.51 | 0.90 |
| Xianyu 508 | 317.00 | 1.01 | 614.50 | 1 | 0.41 | 0.90 |
| Xianyu 696 | 291.00 | 1.27 | 706.00 | 1 | 0.47 | 0.90 |
| Xinjundan 28 | 290.00 | 1.19 | 608.70 | 1 | 0.41 | 0.90 |
| Xinke 910 | 276.60 | 1.00 | 542.00 | 1 | 0.43 | 0.80 |
| Xinnong 008 | 257.00 | 1.38 | 648.00 | 1 | 0.42 | 0.90 |
| Ningyu 30 | 256.55 | 1.01 | 566.84 | 1 | 0.34 | 0.93 |
| Zhengda 12 | 239.67 | 0.54 | 487.33 | 1 | 0.19 | 0.90 |
| Zhengdan 958 | 276.88 | 1.02 | 632.75 | 1 | 0.47 | 0.83 |
| Zhengdan 958（Denong） | 270.00 | 1.08 | 535.00 | 1 | 0.35 | 0.85 |
| Zhengdan 958（Liannong） | 250.00 | 0.98 | 636.00 | 1 | 0.32 | 0.85 |
| Min～Max | 214.00～355.00 | 0.54～1.52 | 332.00～1056.00 | 1～2 | 0.19～0.65 | 0.60～0.95 |


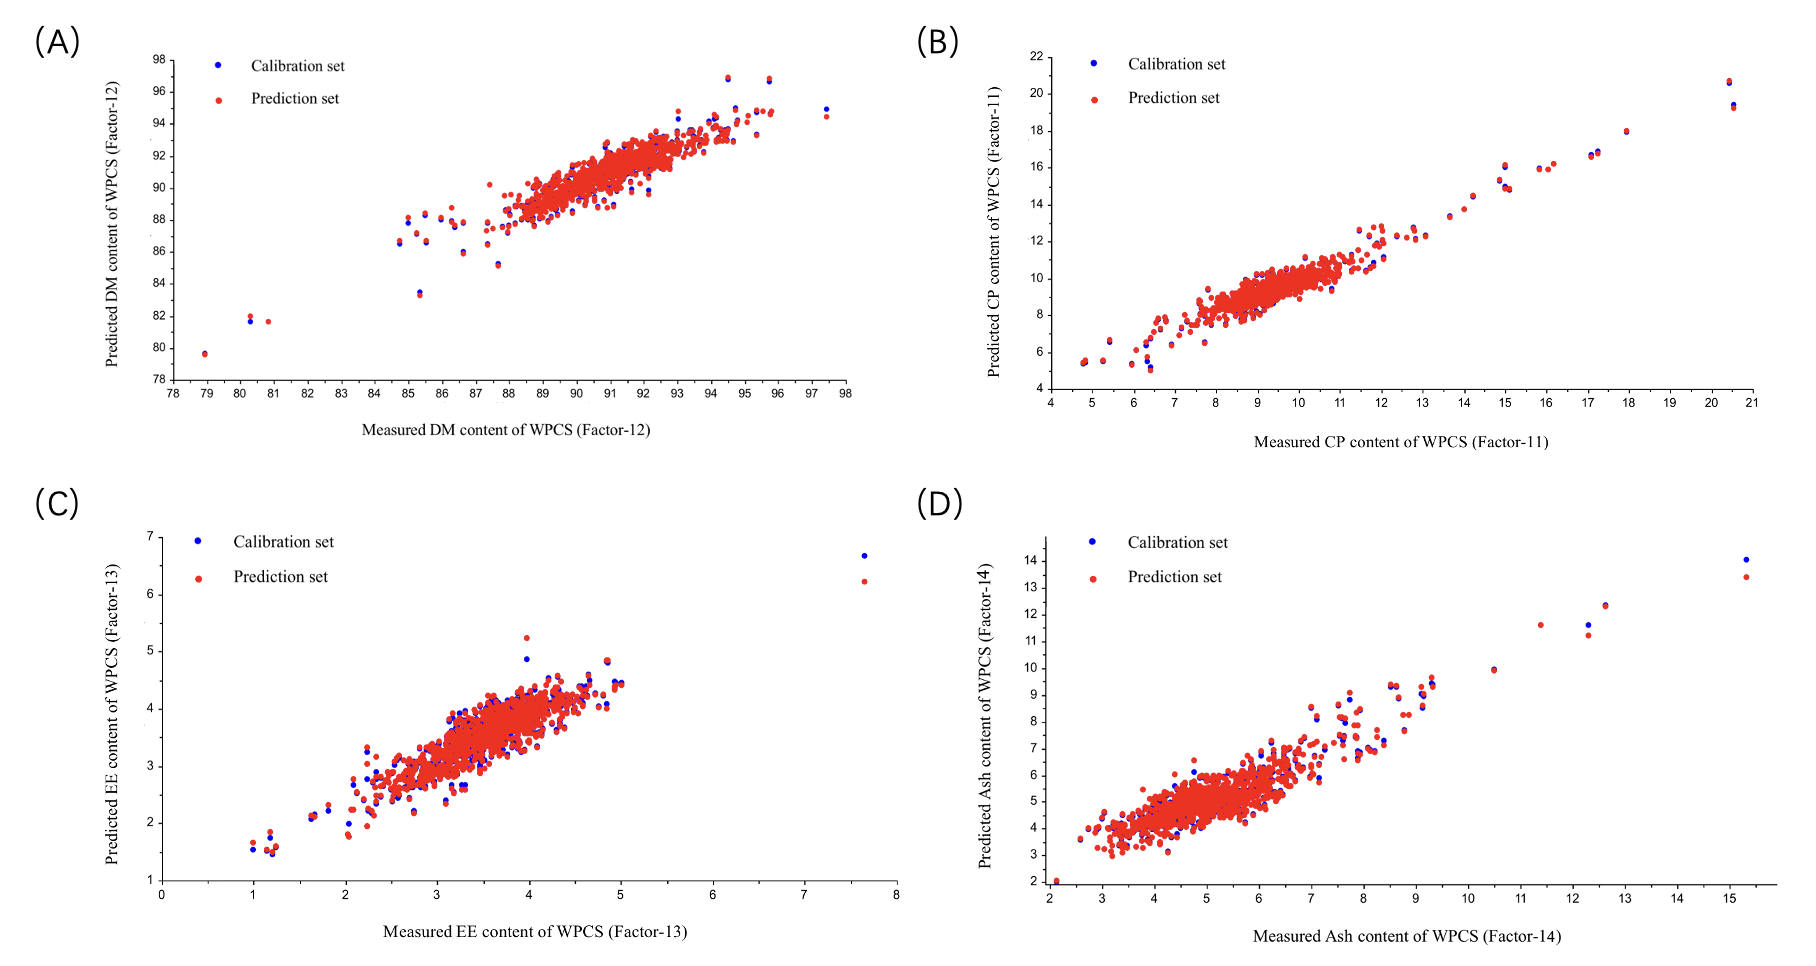

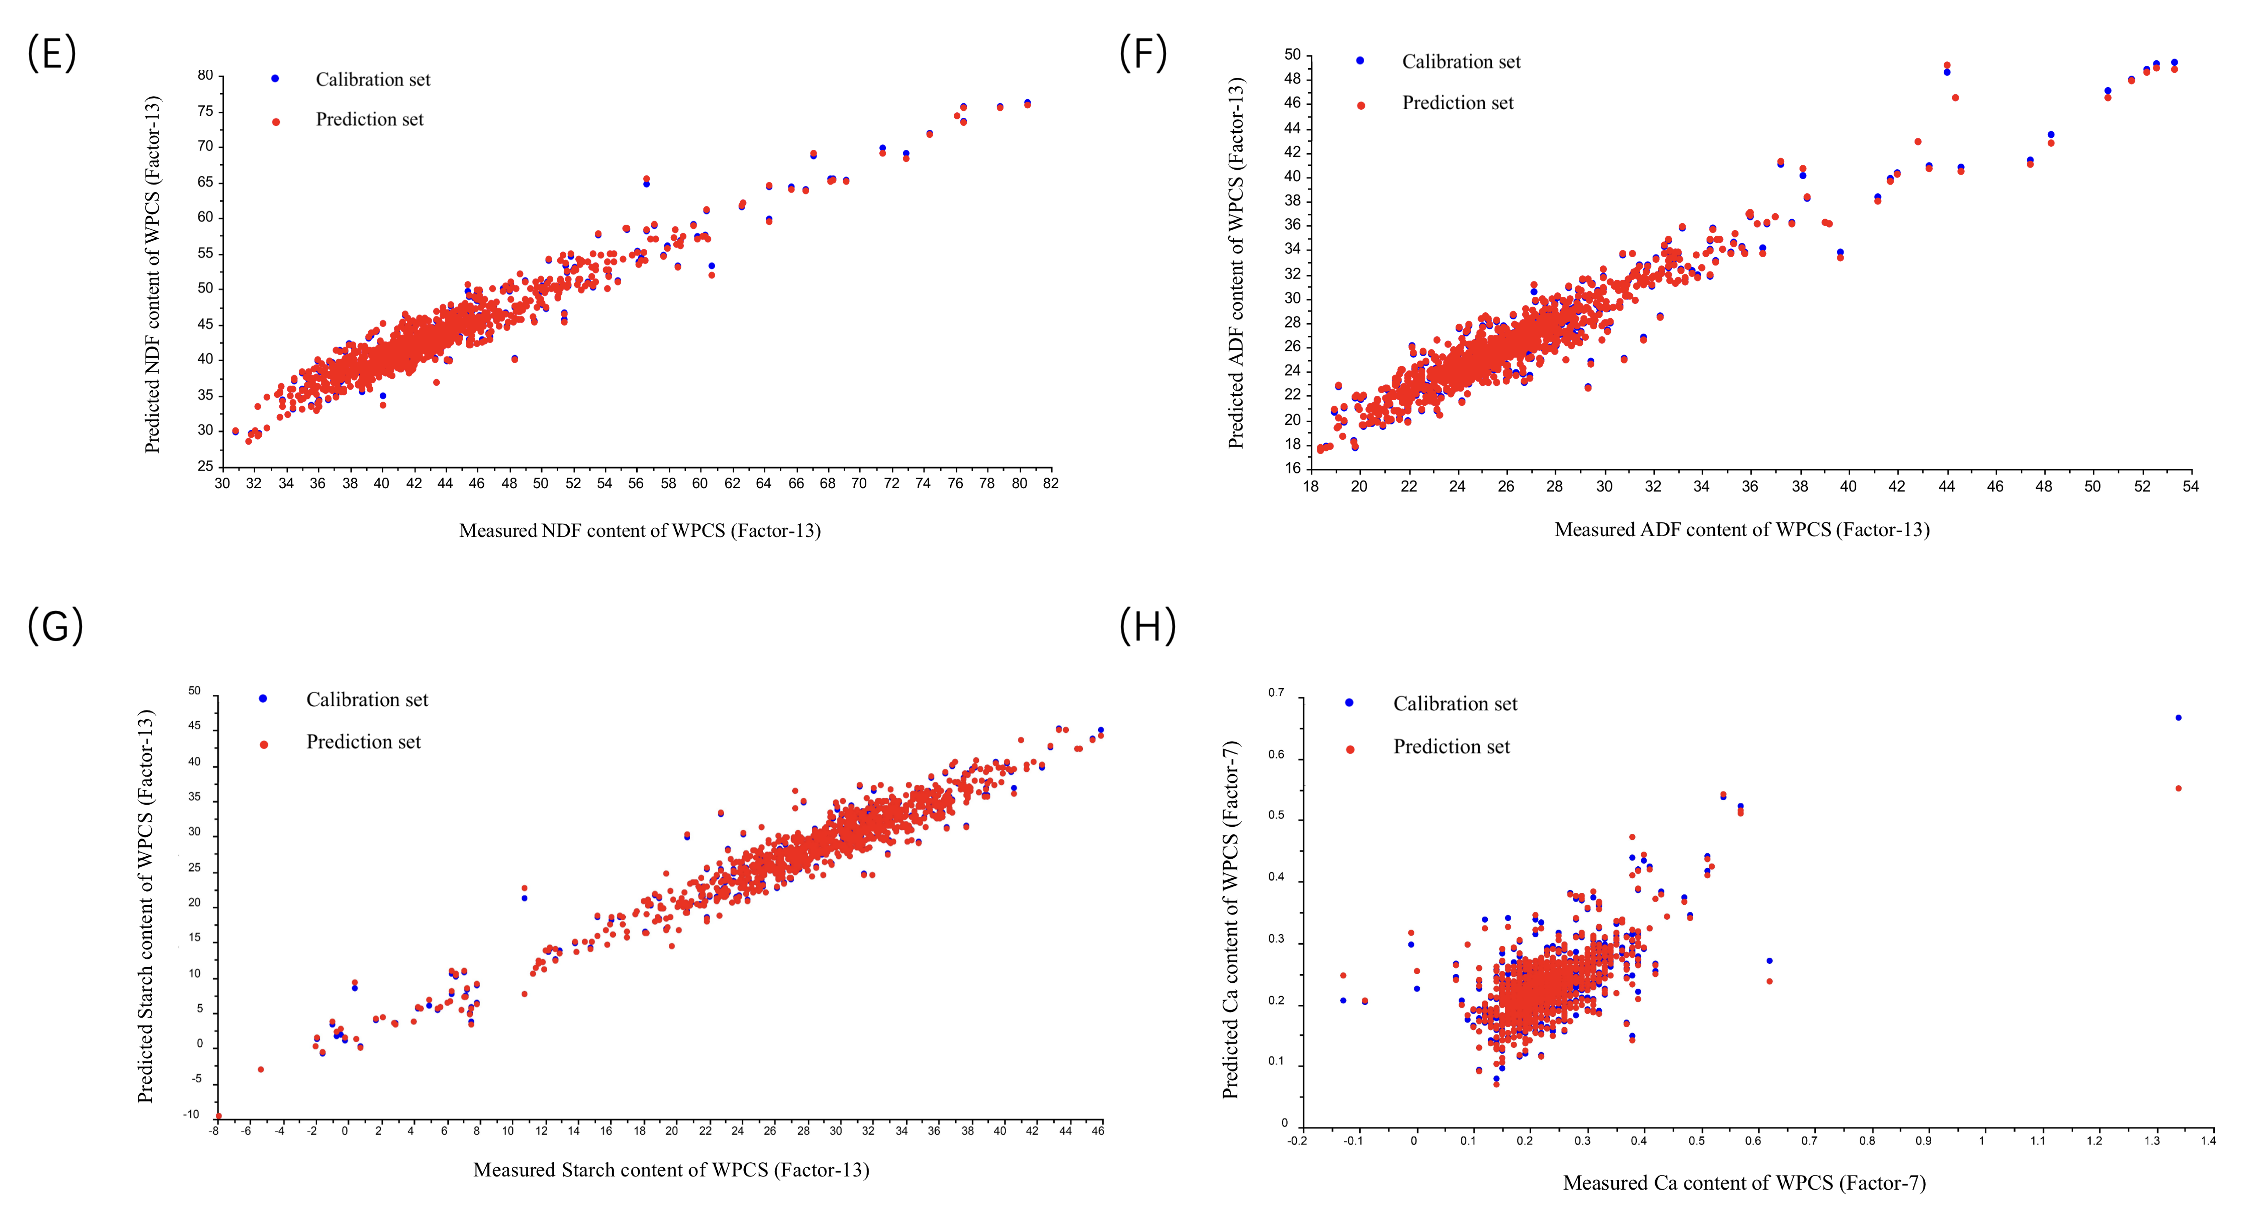

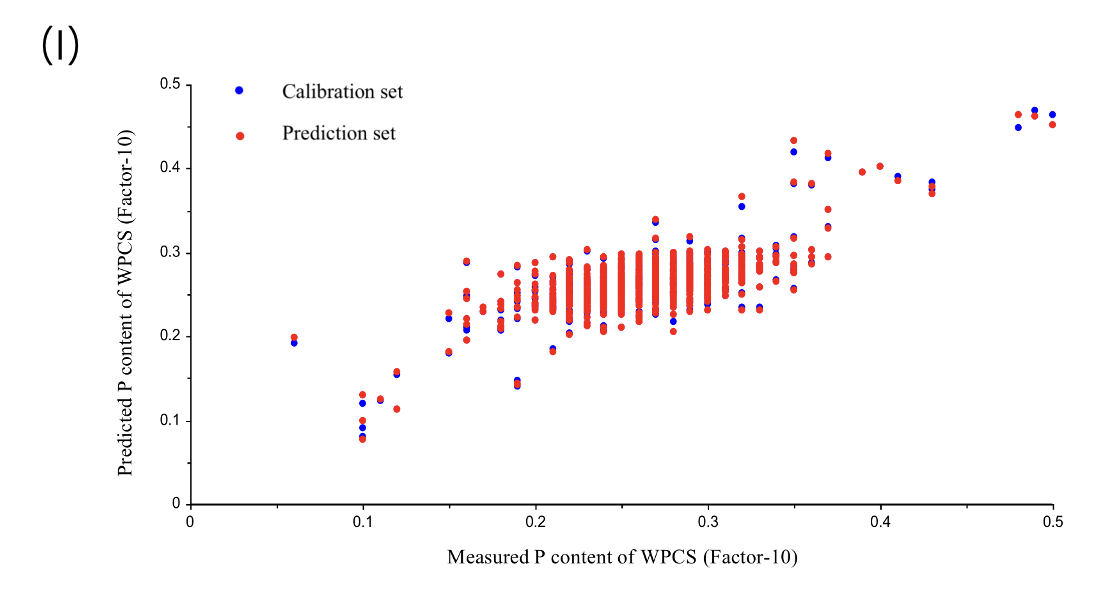


Figure S1. Distribution of predicted and measured nutrient contents of whole plant corn silage based on PLSR model. (A) DM; (B) CP; (C) EE; (D) Ash; (E) NDF; (F) ADF; (G) Starch; (H) Ca; (I) P.


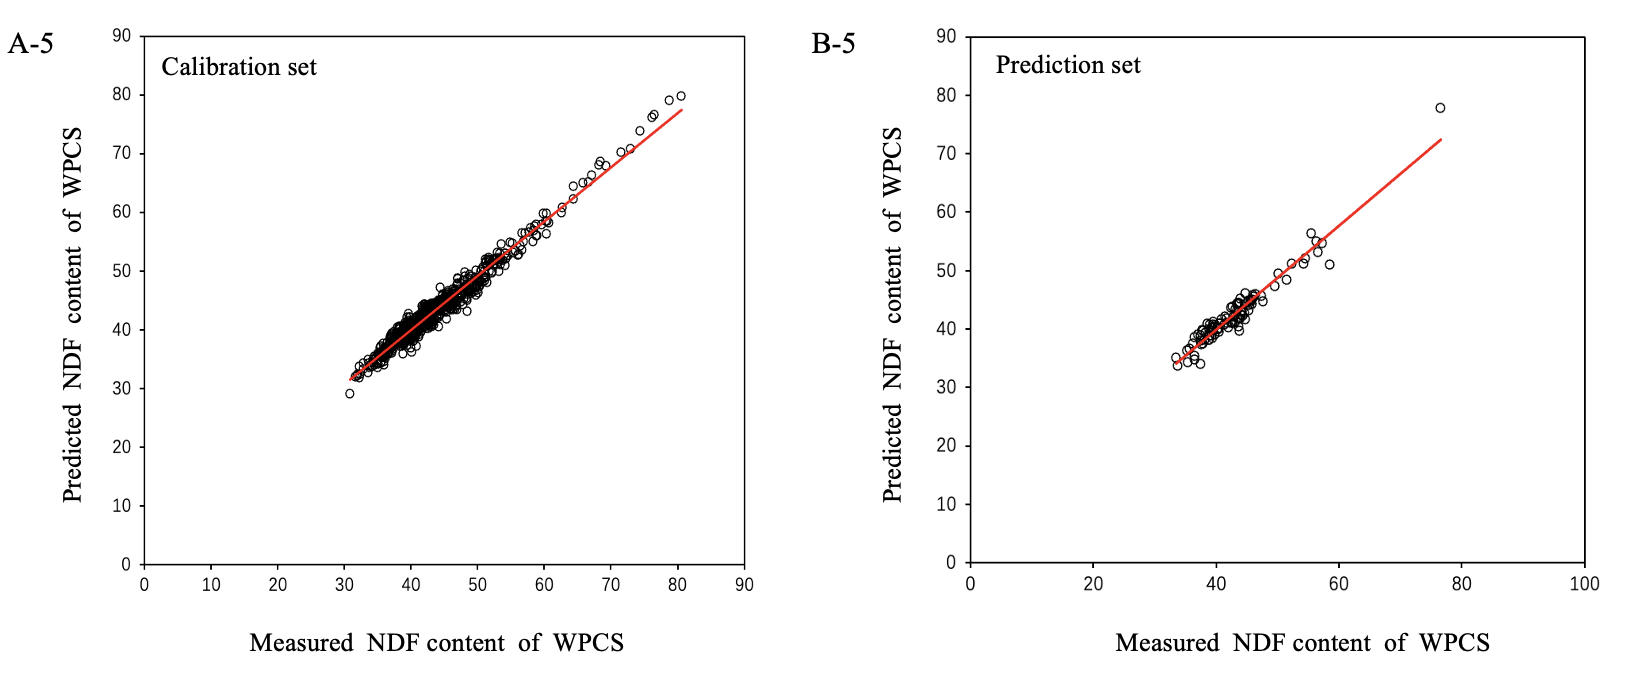


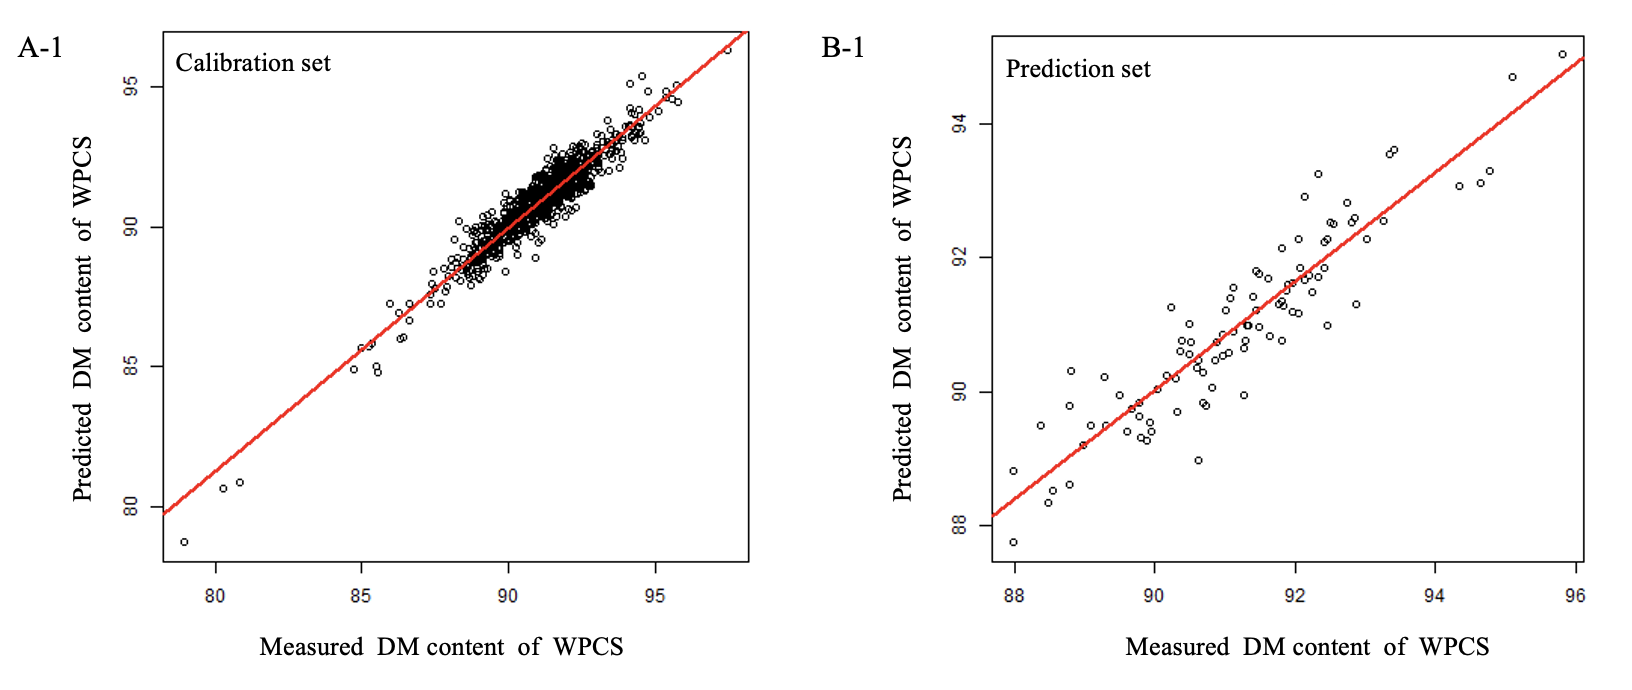

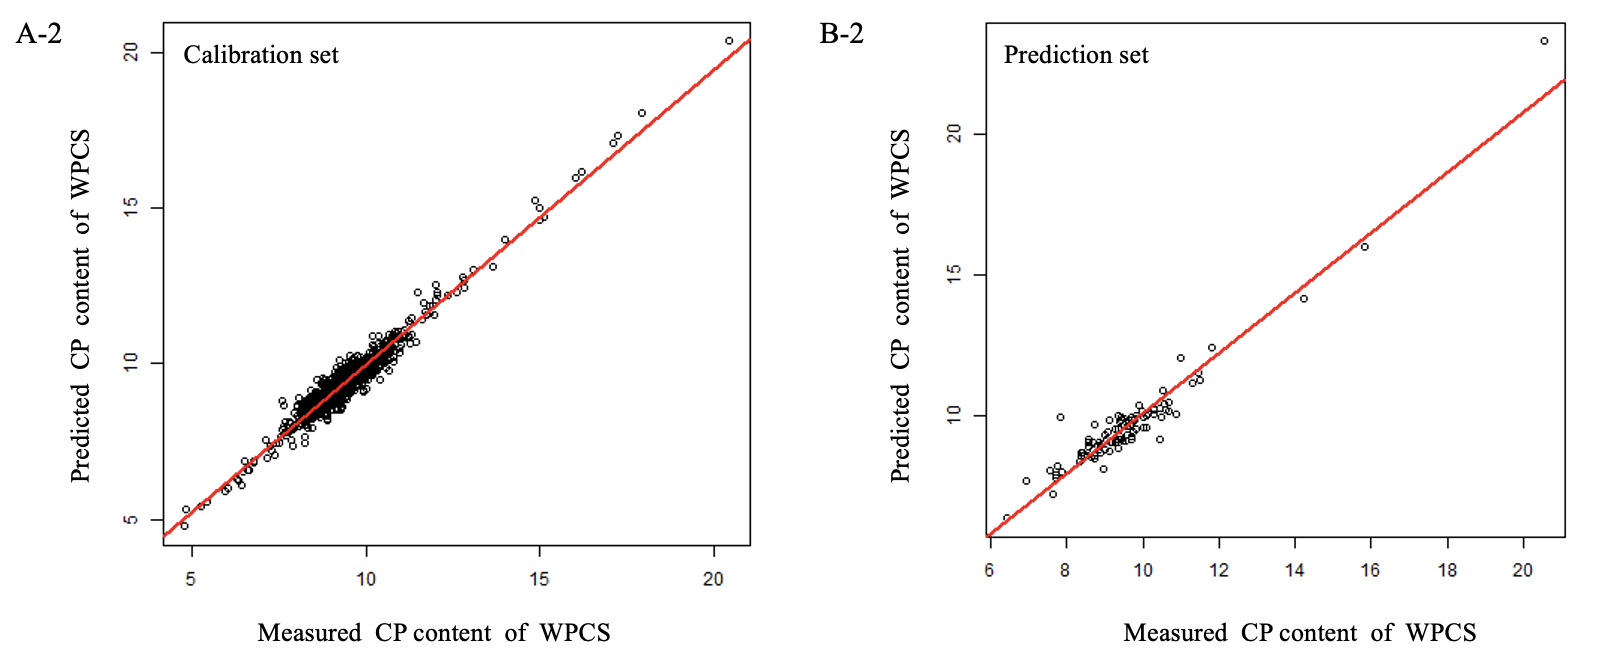

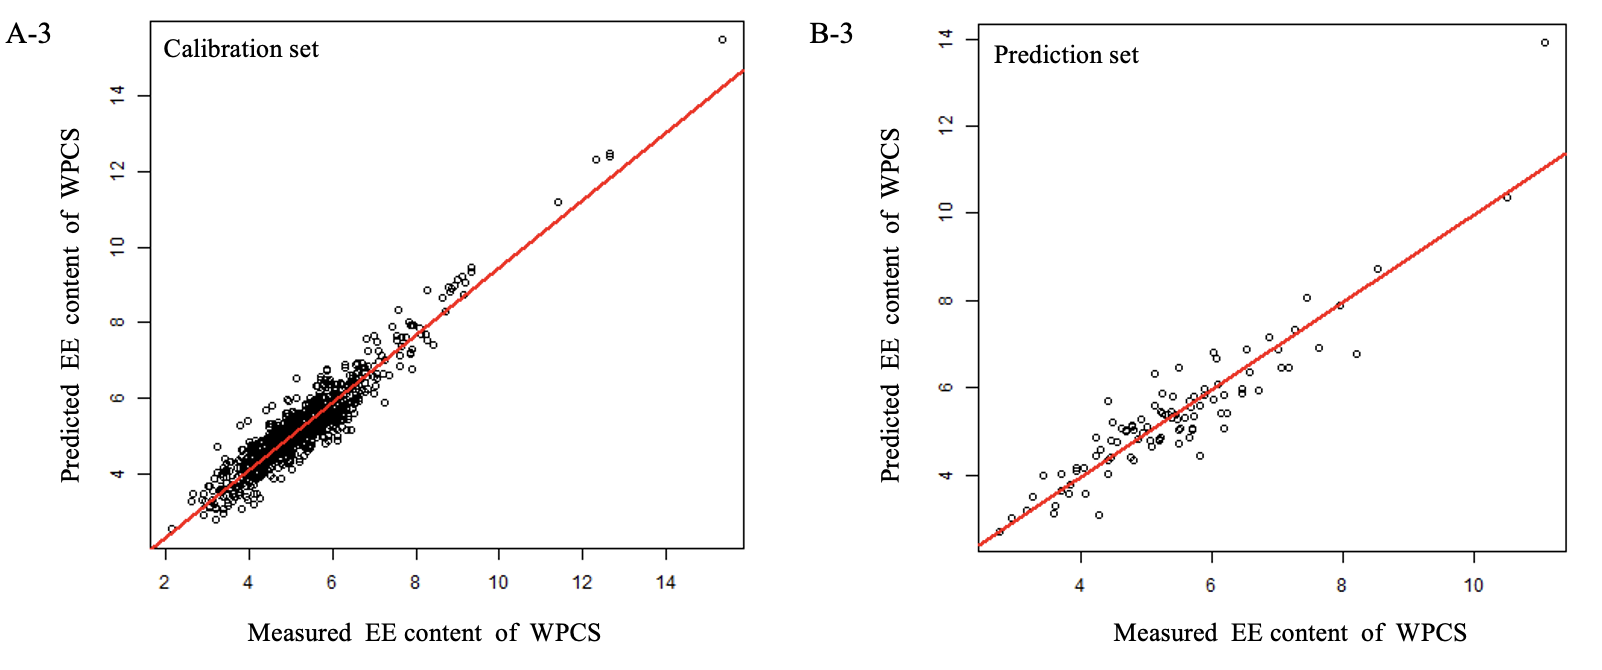

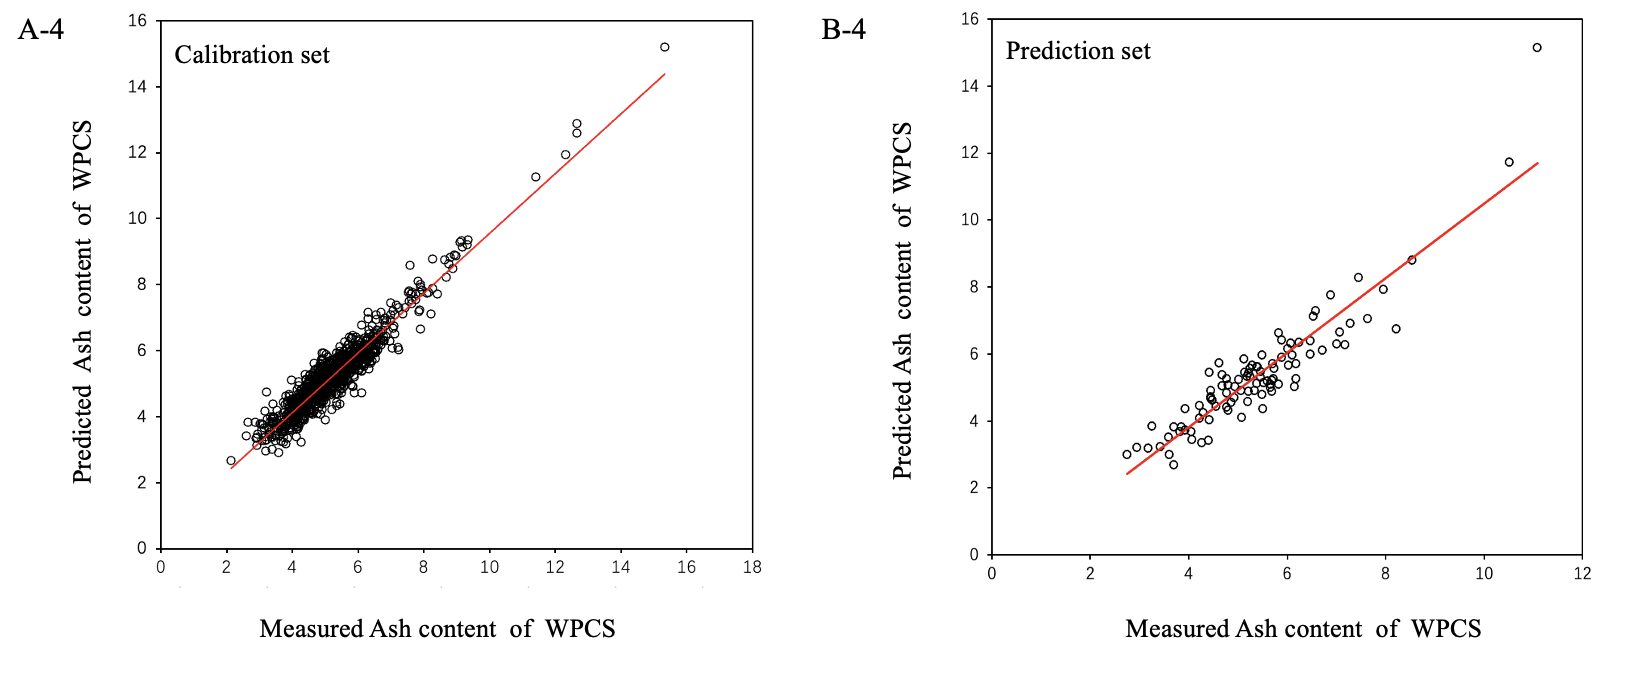


**
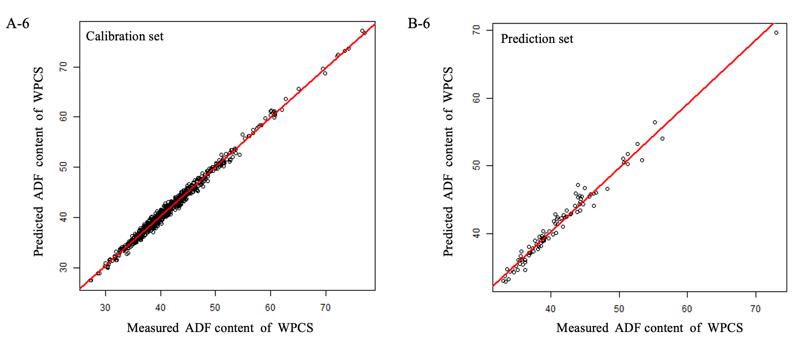
**

**
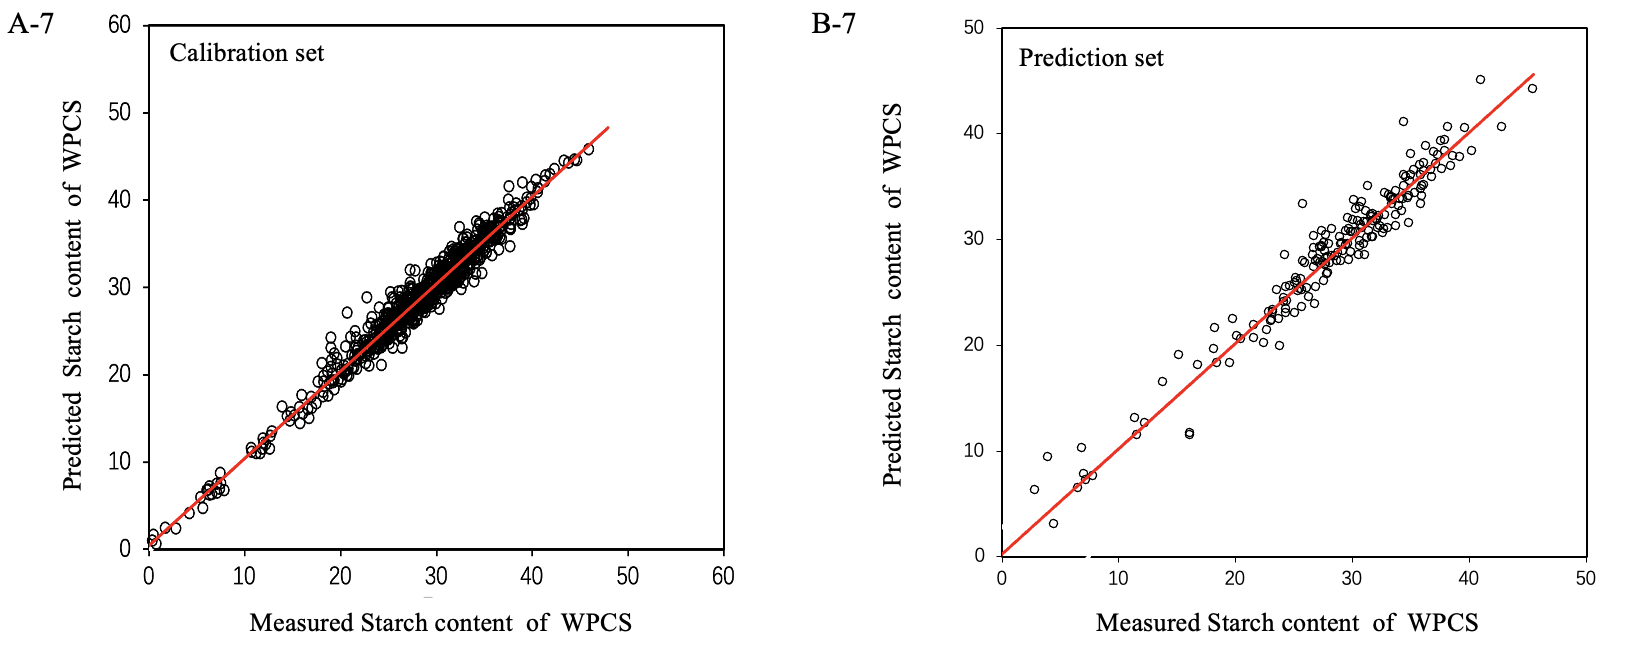
**

**
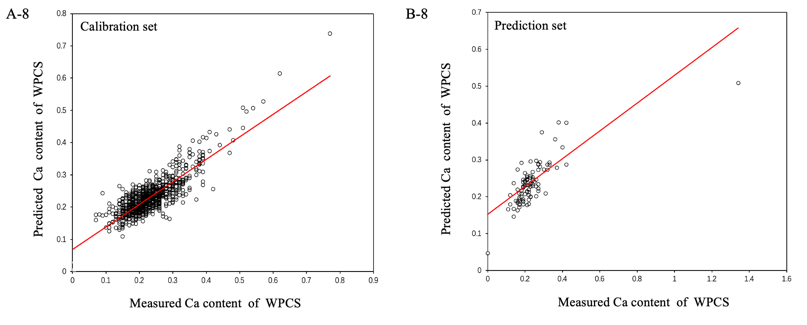
**

**
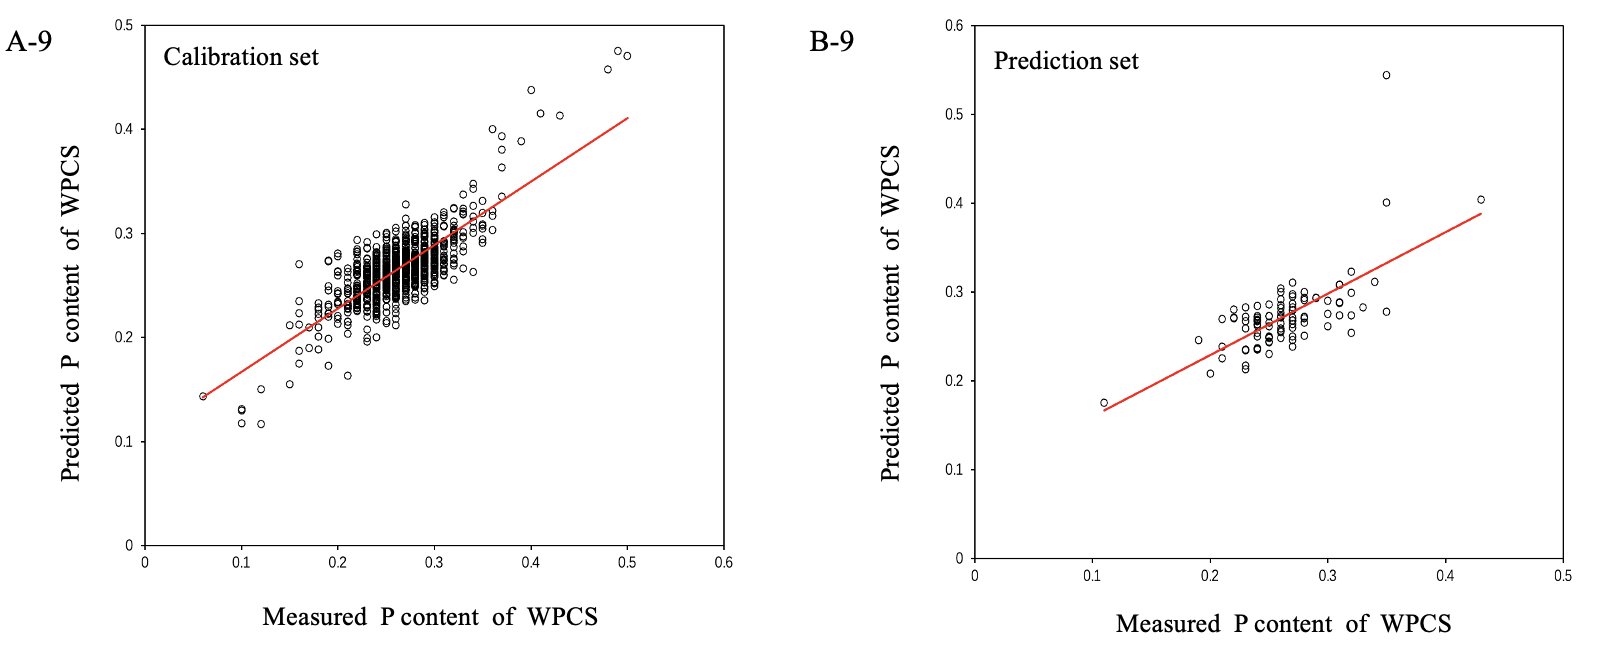
**

Figure S2. Distribution of predicted and measured nutrient contents of whole plant corn silage based on BP-ANN model. (A) internal cross-validation; (B) external validation; (1) DM; (2) CP; (3) EE; (4) Ash; (5) NDF; (6) ADF; (7) Starch; (8) Ca; (9) P.
